# Supplementary material for: Design, synthesis and mesomorphic behaviour of a four-ring achiral bent-core liquid crystal in the nematic phase
Source: Royal Society of Chemistry journal article supplement (doi:10.1039/c6ra05125a), 2016-01-01
Supplement: c6ra05125a1.pdf [file c6ra05125a1.pdf]

## Electronic Supplementary Information

### Design, synthesis and mesomorphic behaviour of four-ring achiral bent-core liquid crystal in the nematic phase.

Amina Nafees,<sup>a</sup> Aloka Sinha,<sup>\*a</sup> Nandiraju V. S. Rao,<sup>b</sup> Gayatri Kalita,<sup>b</sup> Golam Mohiuddin<sup>b</sup> and Manoj Kumar Paul<sup>b</sup>

<sup>a</sup> Department of Physics, Indian Institute of Technology Delhi, Hauz Khas, New Delhi-110016, India;  
E-mail: [aloka@physics.iitd.ac.in](mailto:aloka@physics.iitd.ac.in); Tel: +91-11-26596003 (O).

<sup>b</sup> Chemistry Department, Assam University, Silchar-788011, Assam, India; E-mail: [drnvsrao@gmail.com](mailto:drnvsrao@gmail.com); Tel: +91-9493222541.

| Compound     | Dipole moment (Debye) |                |                |                                                                                                                                     | E (a. u.)<br>(RB3LYP) | Dihedral angle ° | Bend angle (°)<br>θ |
|--------------|-----------------------|----------------|----------------|-------------------------------------------------------------------------------------------------------------------------------------|-----------------------|------------------|---------------------|
|              | μ <sub>x</sub>        | μ <sub>y</sub> | μ <sub>z</sub> | μ <sub>resultant</sub> =<br>(μ <sub>x</sub> <sup>2</sup> +μ <sub>y</sub> <sup>2</sup> +μ <sub>z</sub> <sup>2</sup> ) <sup>1/2</sup> |                       |                  |                     |
| <b>GK3</b>   | -1.94                 | 0.50           | -4.37          | 4.80                                                                                                                                | -1936.17038134        | 102, 137         | 142                 |
| <b>GK4</b>   | -1.94                 | 0.56           | -4.43          | 4.87                                                                                                                                | -1975.49460944        | 102, 137         | 142                 |
| <b>GK3up</b> | 2.08                  | 0.36           | 4.62           | 5.08                                                                                                                                | -1936.17041798        | 104, 136         | 142                 |
| <b>GK4up</b> | 2.09                  | 0.39           | 4.69           | 5.15                                                                                                                                | -1975.49464247        | 104, 136         | 142                 |
| <b>GK5</b>   | -1.33                 | 1.83           | -4.32          | 4.87                                                                                                                                | -1936.16898438        | 135, 138         | 148                 |
| <b>GK6</b>   | -1.33                 | 1.70           | -4.45          | 4.94                                                                                                                                | -1975.49320973        | 135, 137         | 148                 |
| <b>GK5up</b> | 1.58                  | 3.05           | 3.86           | 5.15                                                                                                                                | -1936.16533011        | 138, 138         | 146                 |
| <b>GK6up</b> | 1.57                  | 3.04           | 3.95           | 5.23                                                                                                                                | -1975.48953659        | 138, 138         | 146                 |
| <b>GK1</b>   | -1.58                 | 1.87           | -4.69          | 5.29                                                                                                                                | -1896.84218270        | 136,137          | 146                 |
| <b>GK2</b>   | -1.57                 | 1.74           | -4.81          | 5.36                                                                                                                                | -1936.16640494        | 136,137          | 146                 |

The values relative to angles and dipole moment are expressed in degree (°) and Debye (D) respectively.

**Table 2:** DFT calculated principal polarizability components<sup>a</sup> ( $\alpha_{XX}$ ,  $\alpha_{YY}$ ,  $\alpha_{ZZ}$ ), isotropic polarizability  $\alpha^{iso} = (\alpha_{XX} + \alpha_{YY} + \alpha_{ZZ})/3$ , Polarizability anisotropy  $\Delta\alpha = [\alpha_{XX} - (\alpha_{YY} + \alpha_{ZZ})/2]$ , and asymmetry parameter,  $\eta = [(\alpha_{YY} - \alpha_{ZZ}) / (\alpha_{XX} - \alpha^{iso})]$ . Parameters relative to the molecular polarizability tensor in the Cartesian Reference frame

| Compound     | $\alpha_{XX}$ | $\alpha_{YY}$ | $\alpha_{ZZ}$ | $\alpha_{iso}$ | $\Delta\alpha$ | $\eta_\alpha$ |
|--------------|---------------|---------------|---------------|----------------|----------------|---------------|
| <b>GK3up</b> | 955           | 360           | 344           | 553            | 603            | 0.0398        |
| <b>GK4up</b> | 969           | 373           | 353           | 566            | 606            | 0.0496        |
| <b>GK5</b>   | 1004          | 326           | 357           | 563            | 660            | 0.0703        |
| <b>GK6</b>   | 1020          | 335           | 370           | 575            | 667            | 0.0786        |
| <b>GK1</b>   | 991           | 315           | 340           | 549            | 663            | 0.0565        |
| <b>GK2</b>   | 1007          | 324           | 353           | 561            | 668            | 0.0632        |

<sup>a</sup>All polarizability components and the anisotropy parameter are calculated in Bohr<sup>3</sup> (with 1 Bohr = 0.52917 Å).

S1: Planar molecular structures for optimisation in DFT studies

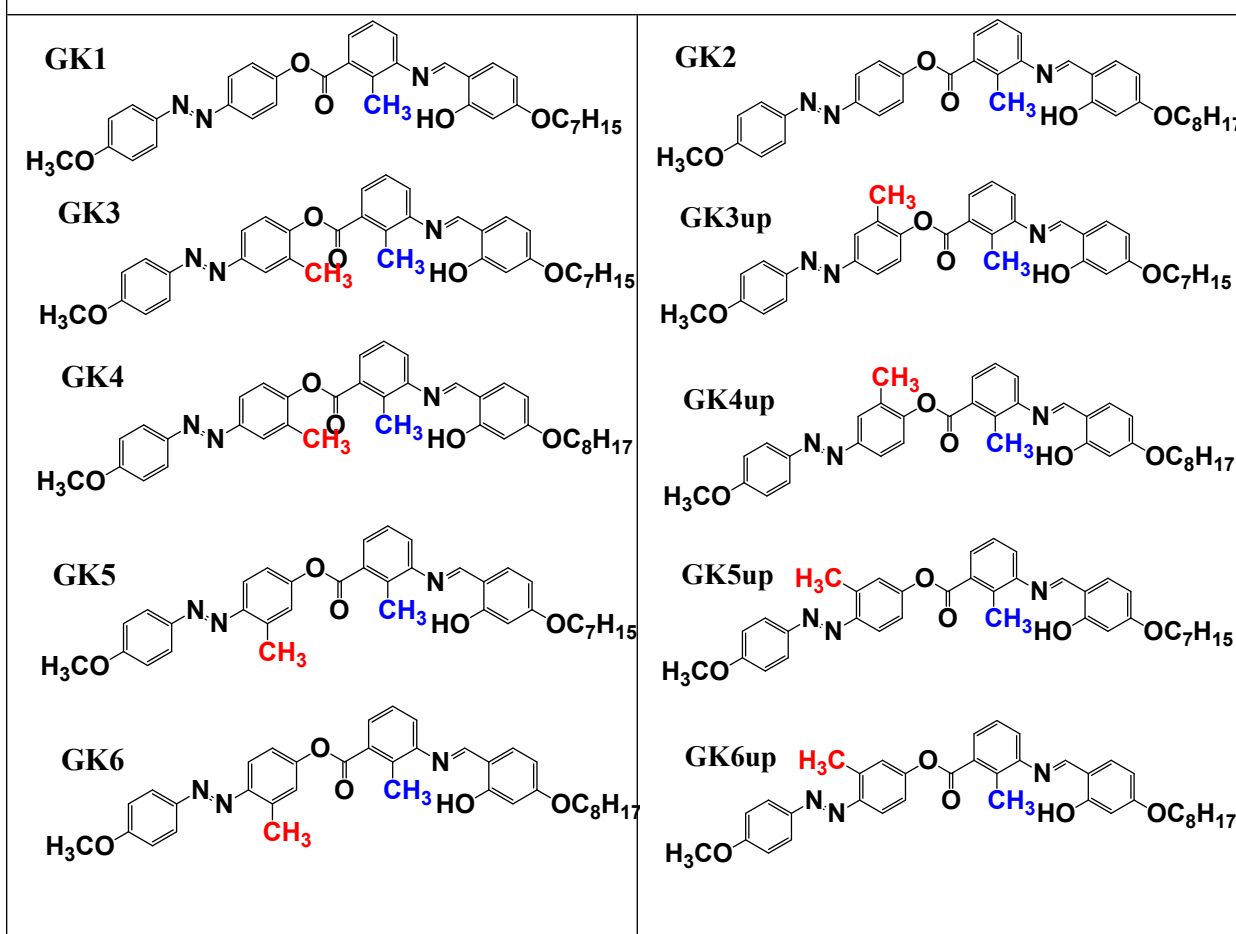

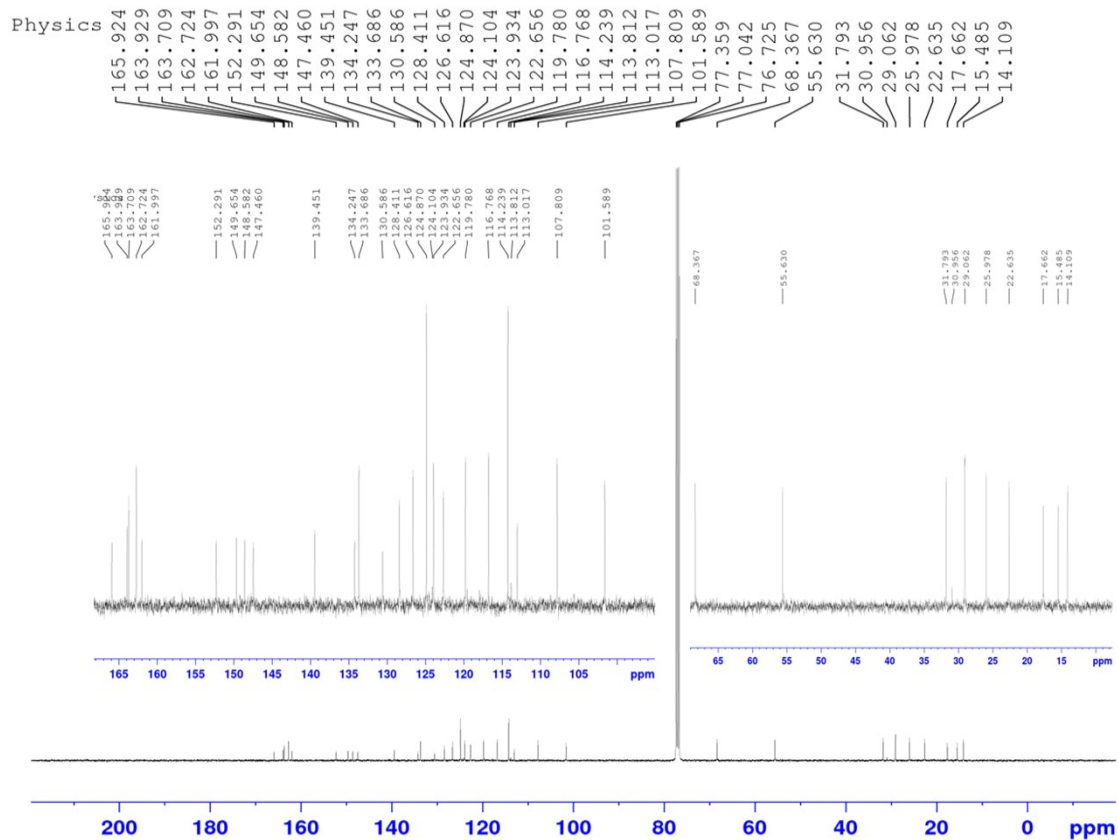

Figure S2:  $^{13}\text{C}$  NMR spectra of compounds GK5 recorded on Bruker Avance AV- III 400 MHz NMR spectrometer.
